# Supplementary material for: Comparative Microbial Nitrogen Functional Gene Abundances in the Topsoil vs. Subsoil of Three Grassland Habitats in Northern China
Source: Frontiers journal article supplement (doi:10.3389/fpls.2021.792002), 2022-01-14

Figure. S1 Redundancy analysis of overall nitrogen functional genes and soil characteristics. The site abbreviations are defined in Table 1.

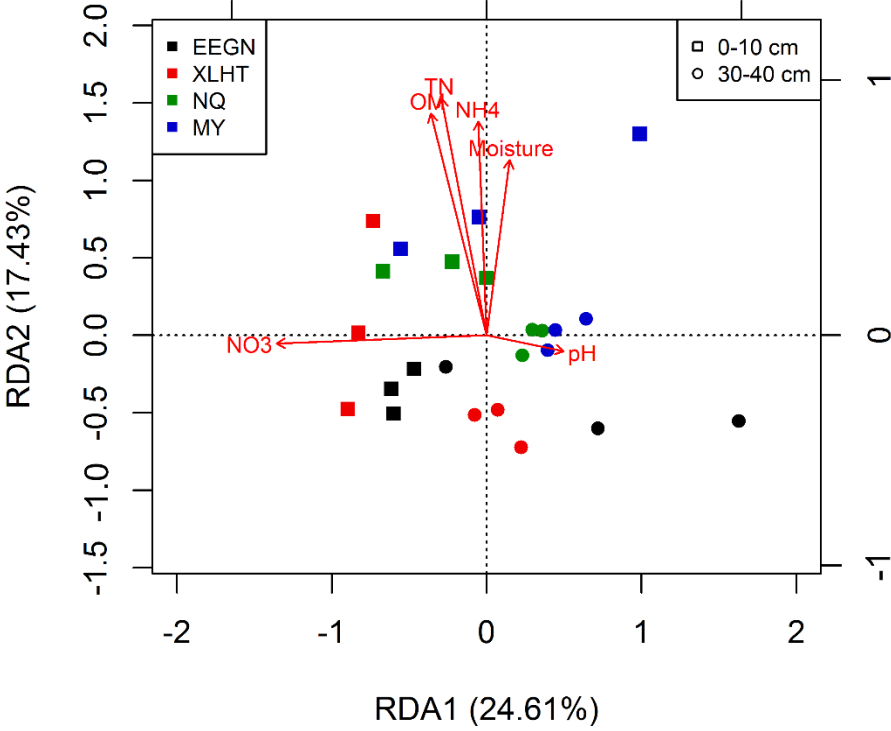

Supplement: Image_1.pdf [file Image_1.pdf]
