# Supplementary material for: Comparative Microbial Nitrogen Functional Gene Abundances in the Topsoil vs. Subsoil of Three Grassland Habitats in Northern China
Source: Frontiers journal article supplement (doi:10.3389/fpls.2021.792002), 2022-01-14
Supplement: Table_1.pdf [file Table_1.pdf]

Table S1. Pairwise geographical distance (km) between every pair of sites. The site abbreviations are defined in Table 1.

|      | EEGN | XLHT | NQ   | MY |
|------|------|------|------|----|
| EEGN |      |      |      |    |
| XLHT | 762  |      |      |    |
| NQ   | 3069 | 2538 |      |    |
| MY   | 2011 | 1458 | 1081 |    |

The geographical distance was calculated based on the latitude and longitude of each site.
